# Supplementary material for: A Survey of Archaeal Restriction–Modification Systems
Source: MDPI journal article supplement (doi:10.3390/microorganisms11102424), 2023-09-28
Supplement: s1 [file s1]

Supplementary Table S1. Profiles and functions used for gene classification.

| Profile Name | Function(s) | Category | Methylation                        | Description                                                                                                                 | No. Sequences |
|--------------|-------------|----------|------------------------------------|-----------------------------------------------------------------------------------------------------------------------------|---------------|
| a1a          | M           | IIM      | m <sup>6</sup> A                   | MTases, group A1 (m <sup>6</sup> A)                                                                                         | 23            |
| a1c          | M           | IIM      | m <sup>4</sup> C                   | MTases, group A1 (m <sup>4</sup> C)                                                                                         | 8             |
| a2           | M           | IIM      | m <sup>6</sup> A                   | MTases, group A2                                                                                                            | 16            |
| b-cog1743    | R, M (?)    | IIG      | m <sup>6</sup> A                   | Annotated as COG1743 (N-MTase with Zn ribbon), probable Type IIG, distantly related to B3 and B4; no characterized examples | 8             |
| b1a          | M           | IIIM     | m <sup>6</sup> A, m <sup>4</sup> C | Type III Mod genes, mostly m <sup>6</sup> A but a few m <sup>4</sup> C                                                      | 38            |
| b1k          | M           | IIM      | m <sup>6</sup> A                   | Type III-like Type II MTases (e.g., KpnI)                                                                                   | 3             |
| b2a          | M           | IIM      | m <sup>6</sup> A                   | MTases, group B2 (m <sup>6</sup> A)                                                                                         | 6             |
| b2c          | M           | IIM      | m <sup>4</sup> C                   | MTases, group B2 (m <sup>4</sup> C); those with bipartite recognition sites have long insertions                            | 25            |
| m1bbs        | M           | IIM      | m <sup>4</sup> C                   | MTases, group B2, probably permuted from b2C ancestor to alpha or gamma (e.g., M1.BbsI)                                     | 4             |
| b3           | M           | IIM      | m <sup>4</sup> C, m <sup>6</sup> A | MTases, group B3, probably permuted from b2C ancestor to alpha; all m <sup>4</sup> C except M.BspHI                         | 22            |
| b4           | M           | IIM      | m <sup>6</sup> A                   | MTases, group B4, probably permuted from b2A ancestor, with Zn ribbon; uncharacterized except M.NdeI                        | 4             |
| b4btgz       | R, M        | IIG      | m <sup>6</sup> A                   | BtgZI-like Type IIG, accompanied by 2 MTases; Mrr-like REase domain at C-terminus                                           | 8             |
| c1bot        | M           | IIM      | m <sup>5</sup> C                   | MTases, m <sup>5</sup> C                                                                                                    | 38            |
| c1top        | M           | IIM      | m <sup>5</sup> C                   | MTases, m <sup>5</sup> C                                                                                                    | 30            |
| ecori-like   | M           | IIM      | m <sup>6</sup> A                   | MTases, M.EcoRI-like                                                                                                        | 6             |
| g1a          | M           | IM       | m <sup>6</sup> A                   | Type Ia HsdM                                                                                                                | 14            |
| g1b          | M           | IM       | m <sup>6</sup> A                   | Type Ib HsdM                                                                                                                | 7             |
| g1c          | M           | IM       | m <sup>6</sup> A                   | Type Ic HsdM                                                                                                                | 12            |
| g1d          | M           | IM       | m <sup>6</sup> A                   | Type Id HsdM                                                                                                                | 17            |
| g1e          | M           | IM       | m <sup>6</sup> A                   | Type Ie HsdM                                                                                                                | 8             |
| g2-bcg       | R, M        | IIG      | m <sup>6</sup> A                   | BcgI-like Type IIG, accompanied by separate S gene; cleaves on both sides at 13/11                                          | 7             |
| g2-haeiv     | R, M        | IIG      | m <sup>6</sup> A                   | HaeIV-like Type IIG, single RMS protein; cleaves on both sides at 13/7 and 14/9                                             | 8             |
| g2           | M           | IIM      | m <sup>6</sup> A                   | MTases, group G2; all with split recognition sites                                                                          | 15            |
| g3-drdv      | R, M        | IIG      | m <sup>6</sup> A                   | DrdV-like Type IIG; RM with SF2 helicase domain, cleaves randomly; S-like C-terminal domain                                 | 7             |
| g3-tspgw     | R, M        | IIG      | m <sup>6</sup> A                   | TspGW-like Type IIG; similar to DrdV but no helicase, cleaves 11/9; S-like C-terminal domain                                | 5             |

|               |       |      |                                    |                                                                                                          |    |
|---------------|-------|------|------------------------------------|----------------------------------------------------------------------------------------------------------|----|
| g4-mme        | R, M  | IIG  | m <sup>6</sup> A                   | MmeI-like Type IIG; cleaves 20/18                                                                        | 15 |
| g5            | M     | IIM  | m <sup>6</sup> A                   | MTases, group G5; all contiguous recognition sites, prototype M.Hpy99XII                                 | 7  |
| g6            | M     | IIM  | m <sup>6</sup> A                   | MTases, group G5; all contiguous recognition sites, prototype M.Hpy188III                                | 5  |
| g7            | M     | IIM  | m <sup>6</sup> A                   | MTases, group G7; all contiguous recognition sites                                                       | 25 |
| g7-bsmf       | R, M  | IIG  | m <sup>6</sup> A                   | BsmFI-like Type IIG, accompanied by 2 MTases; REase domain at N-terminus; cleaves 10/14                  | 5  |
| g7-bspn       | R, M  | IIG  | m <sup>6</sup> A                   | BspCNI-like Type IIG, accompanied by 1 MTase; cleaves 9/7                                                | 6  |
| g7-eco57      | R, M  | IIG  | m <sup>6</sup> A                   | Eco57I-like Type IIG, accompanied by 1 MTase; cleaves 16/14                                              | 7  |
| g7-tth111     | R, M  | IIG  | m <sup>6</sup> A                   | Tth111II-like Type IIG, accompanied by 1 MTase (if non-palindromic recognition site); cleaves 11/9       | 9  |
| g8-pglx       | M     | M    | m <sup>6</sup> A                   | BREX-like MTases                                                                                         | 10 |
| lmoa118-like  | M     | IIM  | m <sup>6</sup> A, m <sup>4</sup> C | MTases, mini-gamma configuration, includes M.LmoA118I (m <sup>6</sup> A) and M.NgoMXV (m <sup>4</sup> C) | 2  |
| mun-like      | M     | IIM  | m <sup>6</sup> A                   | MTases, M.MunI-like; derived from m <sup>6</sup> A RNA MTases                                            | 5  |
| nru-like      | M     | IIM  | m <sup>6</sup> A, m <sup>4</sup> C | MTases, gamma with DPPY motif IV; includes M.NruI (m <sup>6</sup> A) and M.Sbo13I (m <sup>4</sup> C)     | 4  |
| snab-like     | M     | IIM  | m <sup>4</sup> C                   | MTases, M.SnaBI-like                                                                                     | 5  |
| t1dam-like    | M     | IIM  | m <sup>6</sup> A                   | MTases, M.T1Dam-like (phage-encoded)                                                                     | 4  |
| m2maeiv       | M     | IIM  | m <sup>6</sup> A                   | MTases, M2.MaeIV-like, accompany Type IIG systems                                                        | 4  |
| bth571i       | R, M  | IIG  | m <sup>6</sup> A                   | Bth571I-like Type IIG, sometimes accompanied by a complementing MTase fragment                           | 10 |
| bsihki        | R     | IIR  | n/a                                | REases, BsiHKAI-like                                                                                     | 6  |
| cgenes        | C     | C    | n/a                                | C genes                                                                                                  | 13 |
| dpnii         | R     | IIR  | n/a                                | REases, DpnII-like                                                                                       | 7  |
| iiir-gp1      | R     | IIIR | n/a                                | Type III Res, EcoPI-like                                                                                 | 17 |
| iiir-gp2      | R     | IIIR | n/a                                | Type III Res, associated with m <sup>4</sup> C Mod                                                       | 7  |
| iiir-gp3      | R     | IIIR | n/a                                | Type III Res, PstII-like                                                                                 | 4  |
| iiir-gp4      | R     | IIIR | n/a                                | Type III Res, Xor86I-like                                                                                | 9  |
| iv-mrr        | R     | IV   | n/a                                | Type IV REases, EcoKMrr-like                                                                             | 13 |
| iv-ri-like    | R     | IV   | n/a                                | Type IV REases, ScoA3I-like                                                                              | 4  |
| pdexk-duf3883 | R (?) | IIR  | n/a                                | Presumed REases (PDDEXK nucleases, DUF3883); no characterized examples                                   | 7  |
| r1a           | R     | IR   | n/a                                | Type Ia HsdR                                                                                             | 13 |
| r1b           | R     | IR   | n/a                                | Type Ib HsdR                                                                                             | 7  |
| r1c           | R     | IR   | n/a                                | Type Ic HsdR                                                                                             | 12 |
| r1d           | R     | IR   | n/a                                | Type Id HsdR                                                                                             | 15 |
| r1e           | R     | IR   | n/a                                | Type Ie HsdR                                                                                             | 7  |
| s1a           | S     | IS   | n/a                                | Type Ia HsdS                                                                                             | 14 |
| s1b           | S     | IS   | n/a                                | Type Ib HsdS                                                                                             | 6  |
| s1c           | S     | IS   | n/a                                | Type Ic HsdS                                                                                             | 7  |

|        |   |    |     |                                                 |    |
|--------|---|----|-----|-------------------------------------------------|----|
| sld    | S | IS | n/a | Type Id HsdS                                    | 16 |
| sle    | S | IS | n/a | Type Ie HsdS                                    | 12 |
| vgenes | V | V  | n/a | Vsr nucleases (mismatch repair nicking enzymes) | 6  |
